# Supplementary material
Source: MDPI journal article supplement (https://www.mdpi.com/2304-6740/11/3/91)

# Adding Diversity to Diiron Aminocarbyne Complexes with Amine

## Ligands

Chiara Saviozzi, Sara Stocchetti, Giulio Bresciani, Lorenzo Biancalana, Guido Pampaloni, Fabio  
Marchetti

# Supporting Information

| <b><u>Table of contents</u></b>                                                         | <i>Pages</i> |
|-----------------------------------------------------------------------------------------|--------------|
| <b>Figures S1-S11:</b> $^1\text{H}$ and $^{13}\text{C}$ NMR spectra of diiron complexes | S1-S7        |

**Figure S1.**  $^1\text{H}$  NMR spectrum (401 MHz, acetone- $d_6$ ) of **2a** (integration refers to the major isomer)

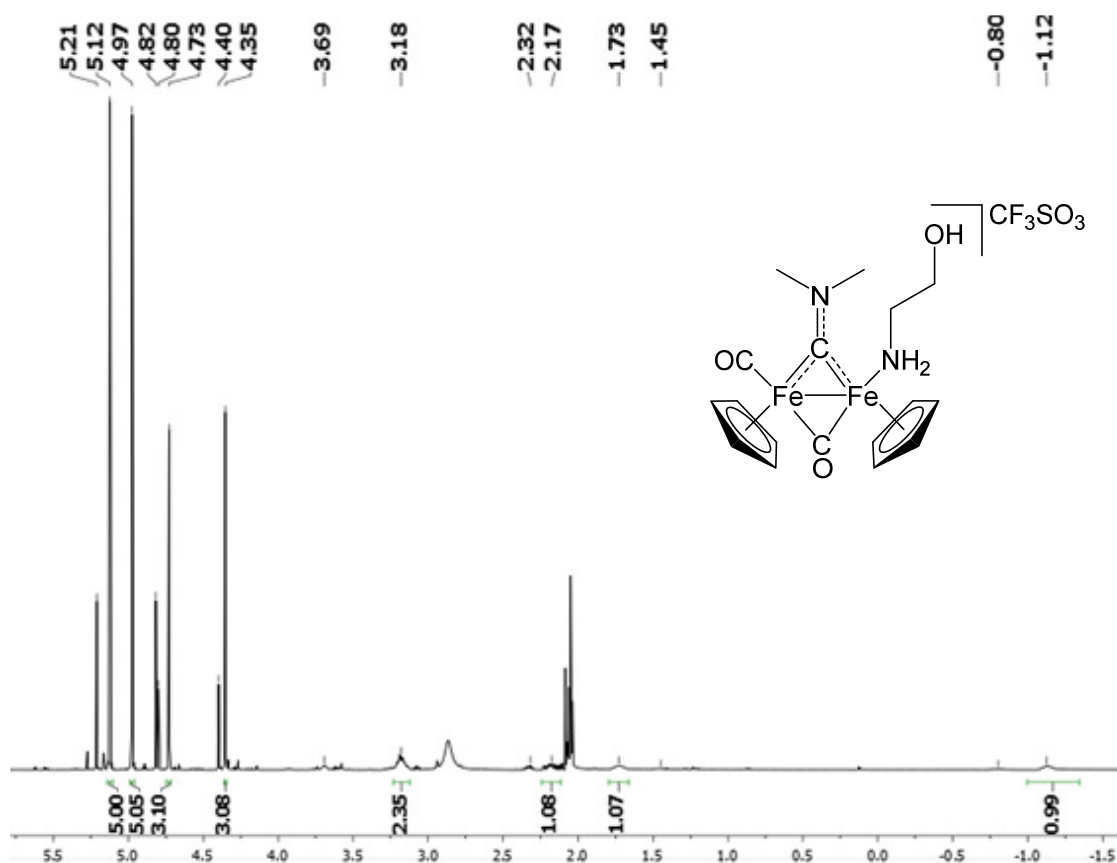

**<sup>1</sup>H NMR Spectrum (CDCl<sub>3</sub>)**

**Chemical Structure:** A ferrocene complex with two cyclopentadienyl rings sandwiching two iron atoms. The left ring is substituted with a cyclopropylmethyl group and a methoxy group (OC). The right ring is substituted with a 2-aminoethoxy group (NH<sub>2</sub>CH<sub>2</sub>CH<sub>2</sub>OH) and a triflate group (OTf, CF<sub>3</sub>SO<sub>3</sub><sup>-</sup>).

**Peak Data:**

| Chemical Shift (ppm) | Integration |
|----------------------|-------------|
| -5.66                |             |
| -4.85                | 5.00        |
| -4.83                | 5.00        |
| -4.80                | 3.00        |
| -4.79                |             |
| -4.50                |             |
| -4.09                |             |
| -3.60                | 1.06        |
| -3.39                | 2.00        |
| -3.32                | 1.71        |
| -3.20                | 1.05        |
| -3.13                |             |
| -2.84                |             |
| -2.43                | 2.01        |
| -2.35                | 2.04        |
| -2.31                | 4.97        |
| -2.28                |             |
| -2.20                |             |
| -2.11                |             |
| -1.57                | 2.80        |
| -1.45                | 5.04        |
| -1.41                |             |
| -1.29                |             |
| -1.23                |             |
| -1.39                |             |
| -1.94                |             |
| -2.14                | 1.05        |

<sup>13</sup>C NMR spectrum of compound 1. The x-axis represents chemical shift in ppm, ranging from 0 to 340. The spectrum shows several sharp peaks. Key peaks are labeled with their chemical shift values: 330.46, 268.12, 212.59, 87.95, 86.73, 78.39, 75.35, 60.82, 50.68, 45.14, 32.99, 32.56, 31.82, 31.58, 31.13, 31.03, 30.81, 26.11, 26.03, 25.50, 25.31, 25.08, and 24.47. The peaks are distributed across the spectrum, with a cluster of peaks between 24 and 33 ppm and another cluster between 45 and 88 ppm.

**Figure S5.**  $^1\text{H}$  NMR spectrum (401 MHz,  $\text{CDCl}_3$ ) of **2c** (integration refers to the major isomer)

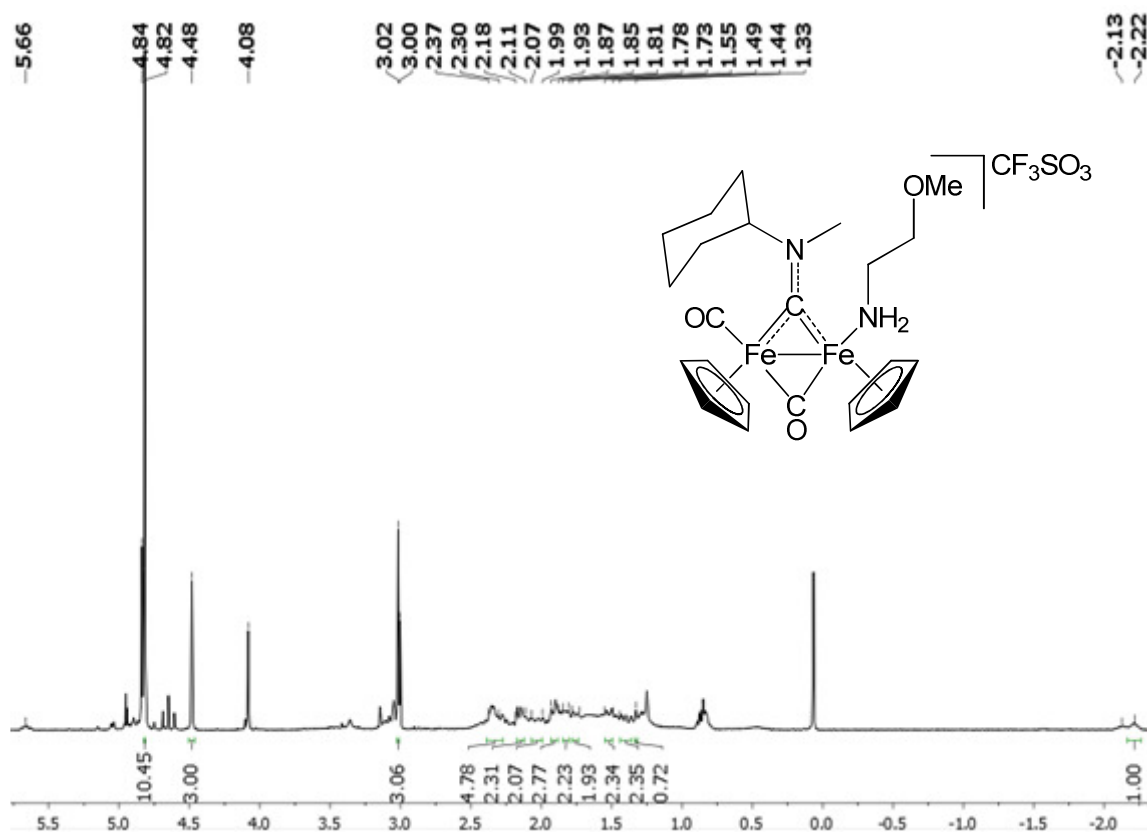

**Figure S6.**  $^{13}\text{C}\{^1\text{H}\}$  NMR spectrum (101 MHz,  $\text{CDCl}_3$ ) of **2c**

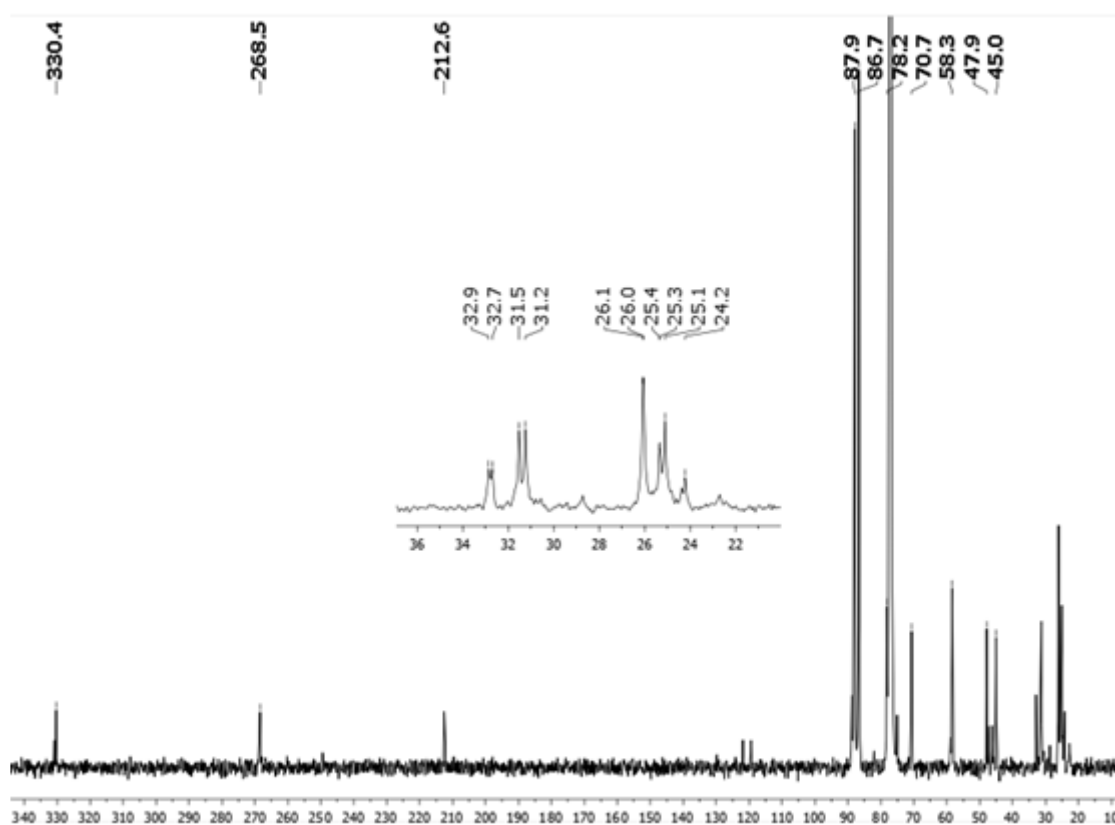

**Figure S7.**  $^1\text{H}$  NMR spectrum (401 MHz,  $\text{CDCl}_3$ ) of  $\text{NH}_2^{\text{ox}}$

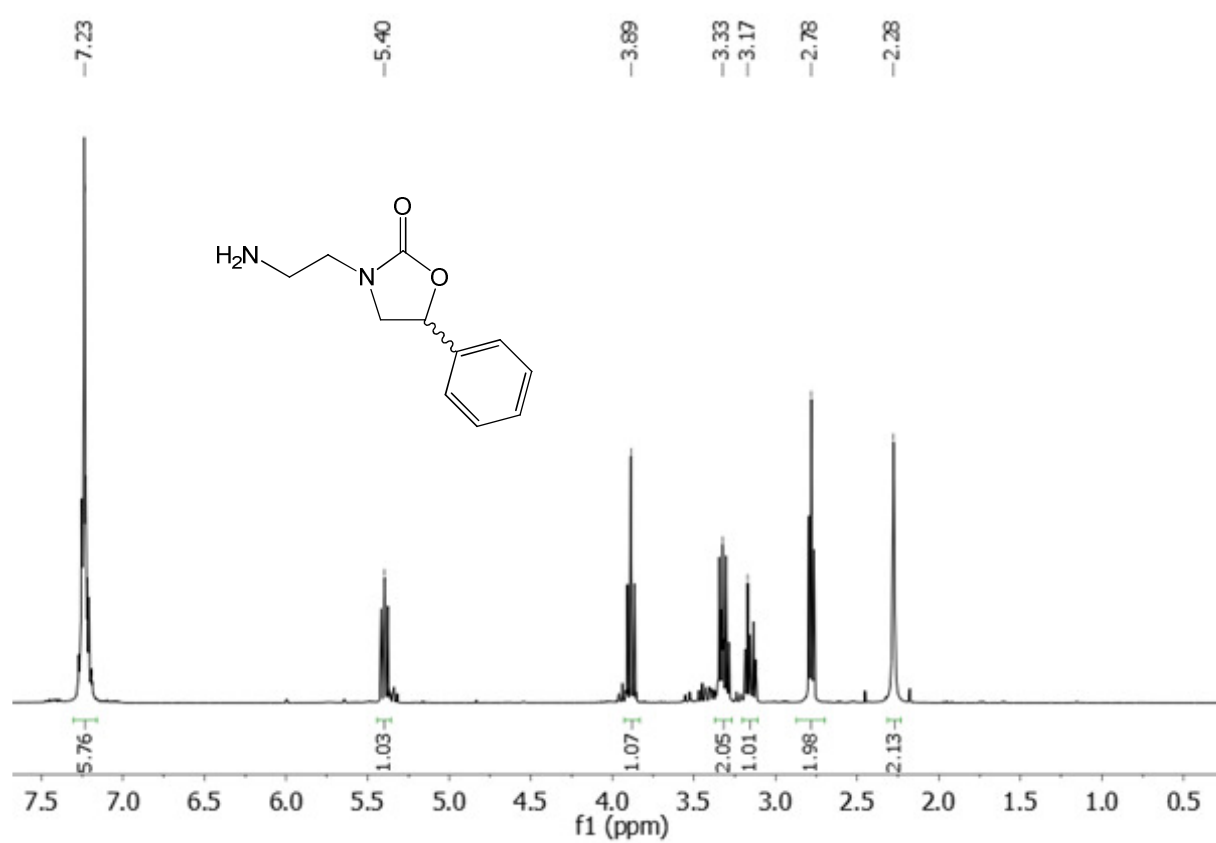

**Figure S8.**  $^1\text{H}$  NMR spectrum (401 MHz, acetone- $d_6$ ) of **3**

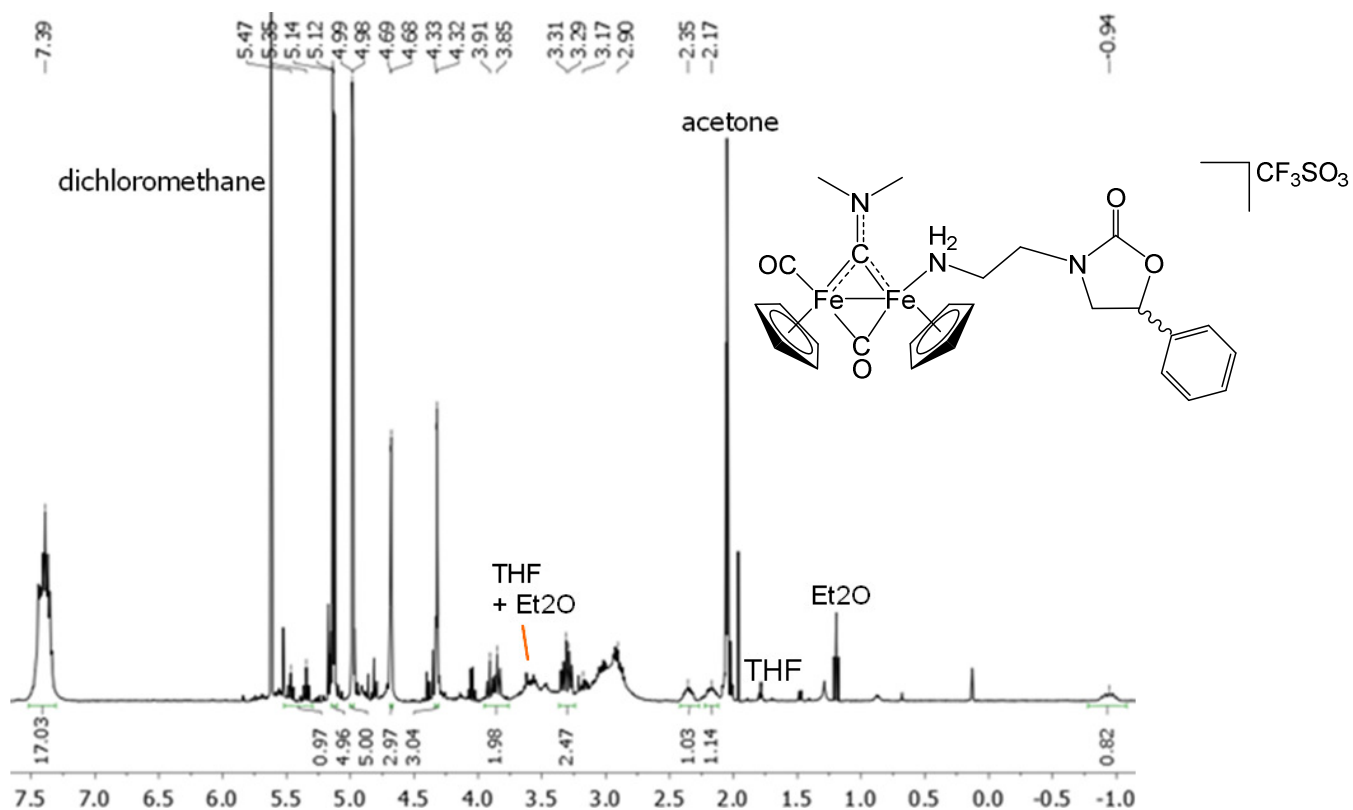

**Figure S9.**  $^{13}\text{C}\{^1\text{H}\}$  NMR spectrum (101 MHz, acetone- $d_6$ ) of **3**

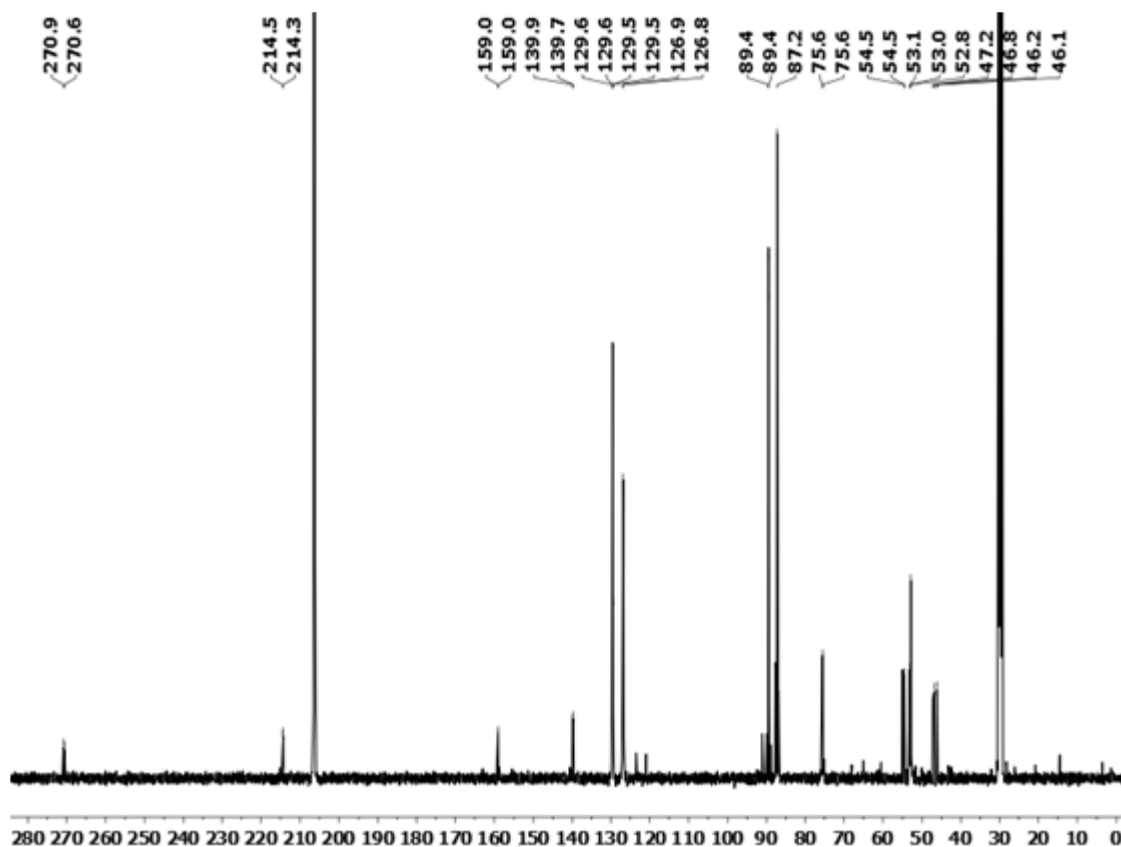

**Figure S10.**  $^1\text{H}$  NMR spectrum (401 MHz, acetone- $d_6$ ) of **4a** (integration refers to the major isomer)

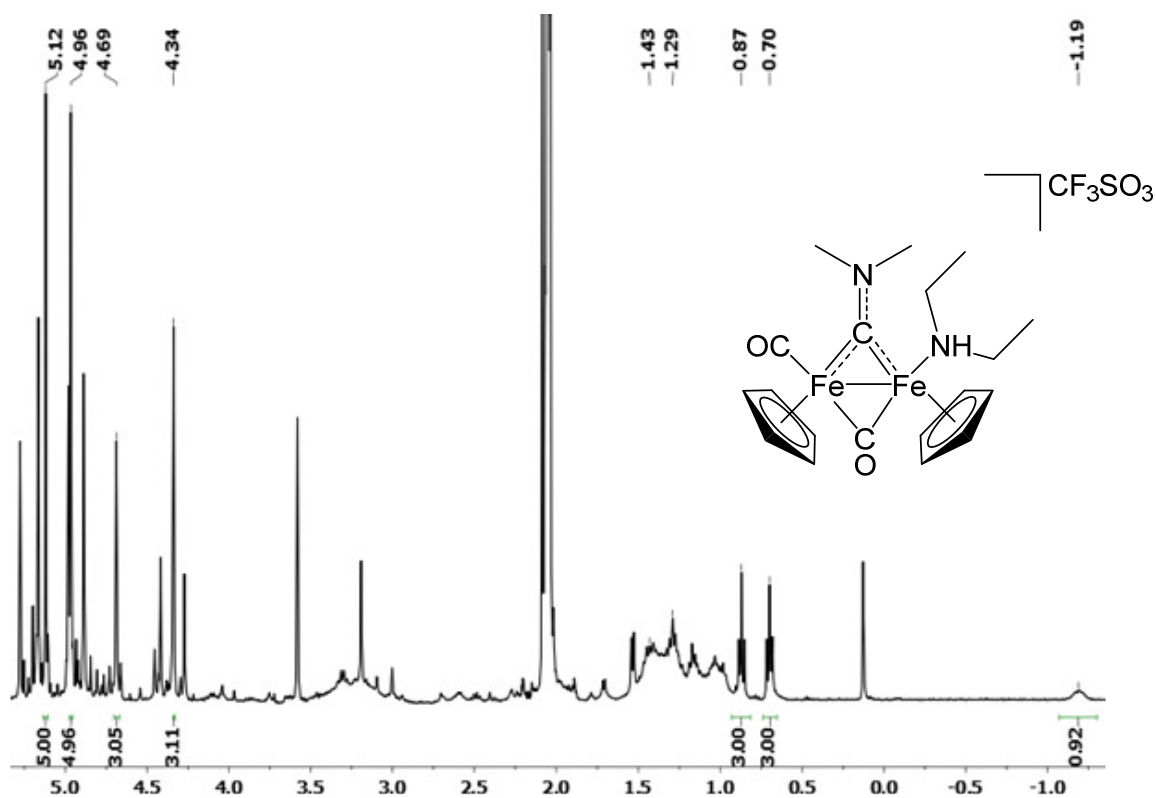

**Figure S11.**  $^1\text{H}$  NMR spectrum (401 MHz,  $\text{CDCl}_3$ ) of **4b** (integration refers to the major isomer)

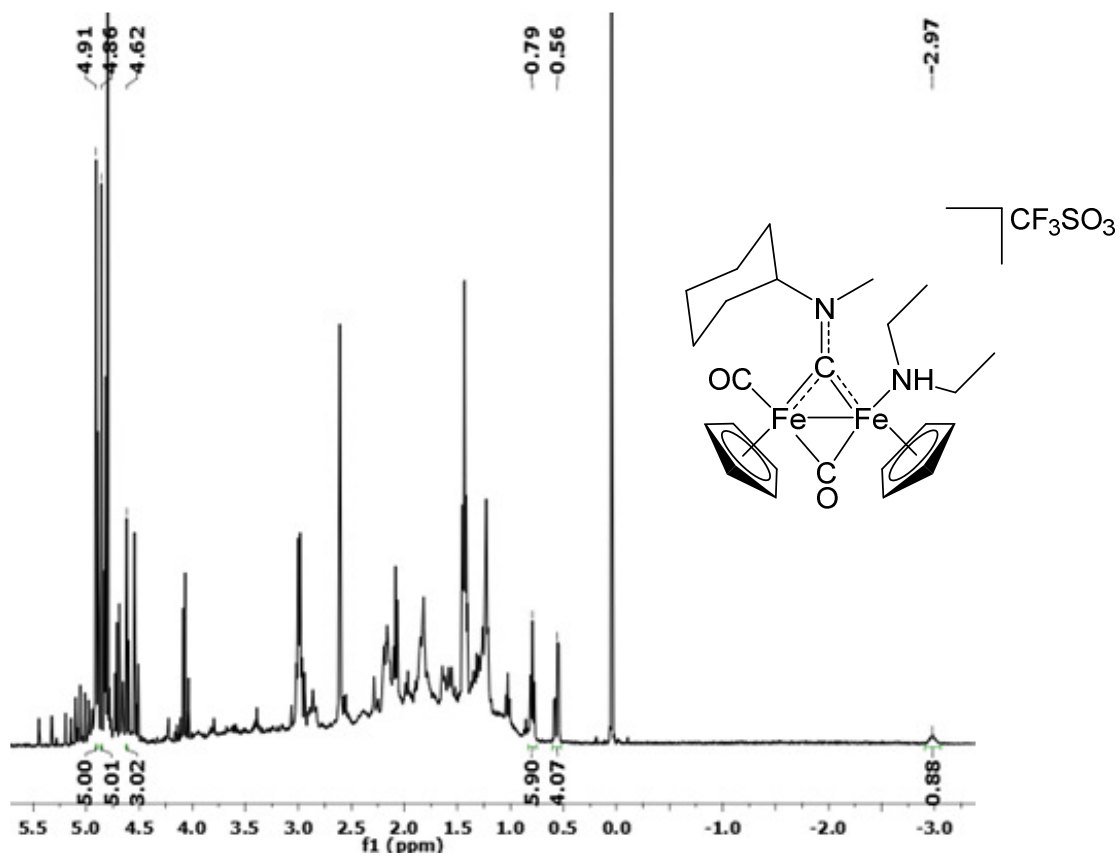

Supplement: s1 [file s1]
